# Supplementary material for: The hypoxia-response pathway modulates RAS/MAPK–mediated cell fate decisions in Caenorhabditis elegans
Source: PubMed Central journal article supplement (PMC6536719; doi:10.26508/lsa.201800255), 2019-05-24
Supplement: LSA-2018-00255_TableS1.pdf [file LSA-2018-00255_TableS1.pdf]

Supplemental table 2

| Sequence Name | Gene Name | Genotype                                       | VI   | 95% C.I.    | P     | % Muv | n    |
|---------------|-----------|------------------------------------------------|------|-------------|-------|-------|------|
| K10H10.4      | -         | <i>let-60(n1046); egl-9(sa307)<sup>1</sup></i> | 3.09 | 3.00 - 3.20 | 0.005 | 14    | 22   |
|               |           | <i>let-60(n1046); hif-1(zh111)<sup>1</sup></i> | 4.28 | 4.10 - 4.51 | 0.650 | 90    | 44   |
| W07A12.6      | oac-54    | <i>let-60(n1046); egl-9(sa307)<sup>1</sup></i> | 3.20 | 3.10 - 3.35 | 0.102 | 30    | 20   |
|               |           | <i>let-60(n1046); hif-1(zh111)<sup>1</sup></i> | n.a. | n.a.        | n.a.  | n.a.  | n.a. |
| Y44A6C.1      | -         | <i>let-60(n1046); egl-9(sa307)<sup>1</sup></i> | 3.18 | 3.05 - 3.34 | 0.072 | 23    | 22   |
|               |           | <i>let-60(n1046); hif-1(zh111)</i>             | n.a. | n.a.        | n.a.  | n.a.  | n.a. |
| T05B4.2       | nhr-57    | <i>let-60(n1046); egl-9(sa307)<sup>3</sup></i> | 3.58 | 3.38 - 3.77 | 0.000 | 69    | 26   |
|               |           | <i>let-60(n1046); hif-1(zh111)<sup>3</sup></i> | 4.70 | 4.47 - 4.94 | 0.901 | 100   | 32   |
| T25E12.4      | dkf-2     | <i>let-60(n1046); egl-9(sa307)<sup>1</sup></i> | 3.28 | 3.11 - 3.46 | 0.199 | 33    | 27   |
|               |           | <i>let-60(n1046); hif-1(zh111)</i>             | n.a. | n.a.        | n.a.  | n.a.  | n.a. |
| M01H9.3       | -         | <i>let-60(n1046); egl-9(sa307)<sup>1</sup></i> | 3.27 | 3.05 - 3.55 | 0.236 | 25    | 20   |
|               |           | <i>let-60(n1046); hif-1(zh111)</i>             | n.a. | n.a.        | n.a.  | n.a.  | n.a. |
| C56E6.2       | -         | <i>let-60(n1046); egl-9(sa307)<sup>1</sup></i> | 3.11 | 3.00 - 3.24 | 0.014 | 13    | 23   |
|               |           | <i>let-60(n1046); hif-1(zh111)<sup>1</sup></i> | 4.03 | 3.65 - 4.45 | 0.302 | 70    | 20   |
| F22B5.7       | zyg-9     | <i>let-60(n1046); egl-9(sa307)<sup>1</sup></i> | 3.08 | 3.00 - 3.22 | 0.006 | 9     | 23   |
|               |           | <i>let-60(n1046); hif-1(zh111)</i>             | n.a. | n.a.        | n.a.  | n.a.  | n.a. |
| C01B4.1       | str-257   | <i>let-60(n1046); egl-9(sa307)<sup>1</sup></i> | 3.10 | 3.03 - 3.21 | 0.008 | 21    | 19   |
|               |           | <i>let-60(n1046); hif-1(zh111)</i>             | n.a. | n.a.        | n.a.  | n.a.  | n.a. |
| C29F9.5       | -         | <i>let-60(n1046); egl-9(sa307)<sup>1</sup></i> | 3.04 | 3.00 - 3.11 | 0.000 | 9     | 23   |
|               |           | <i>let-60(n1046); hif-1(zh111)<sup>1</sup></i> | 4.46 | 4.07 - 4.86 | 0.797 | 86    | 22   |
| C36A4.9       | acs-19    | <i>let-60(n1046); egl-9(sa307)<sup>1</sup></i> | 3.12 | 3.00 - 3.28 | 0.034 | 10    | 20   |
|               |           | <i>let-60(n1046); hif-1(zh111)<sup>1</sup></i> | 4.10 | 3.73 - 4.45 | 0.430 | 80    | 20   |
| F45D11.16     | -         | <i>let-60(n1046); egl-9(sa307)<sup>2</sup></i> | 3.17 | 3.05 - 3.33 | 0.028 | 19    | 21   |
|               |           | <i>let-60(n1046); hif-1(zh111)</i>             | n.a. | n.a.        | n.a.  | n.a.  | n.a. |
| W04E12.4      | -         | <i>let-60(n1046); egl-9(sa307)<sup>2</sup></i> | 3.51 | 3.33 - 3.71 | 0.838 | 55    | 29   |
|               |           | <i>let-60(n1046); hif-1(zh111)<sup>2</sup></i> | 4.22 | 3.95 - 4.48 | 0.007 | 87    | 30   |
| F53F4.5a      | fmo-4     | <i>let-60(n1046); egl-9(sa307)<sup>2</sup></i> | 3.31 | 3.14 - 3.52 | 0.243 | 38    | 21   |
|               |           | <i>let-60(n1046); hif-1(zh111)</i>             | n.a. | n.a.        | n.a.  | n.a.  | n.a. |
| K08E3.1       | tyr-2     | <i>let-60(n1046); egl-9(sa307)<sup>3</sup></i> | 3.04 | 3.00 - 3.13 | 0.281 | 4     | 23   |
|               |           | <i>let-60(n1046); hif-1(zh111)<sup>3</sup></i> | 3.96 | 3.74 - 4.19 | 0.002 | 67    | 55   |
| C01B12.1      | sqt-2     | <i>let-60(n1046); egl-9(sa307)<sup>3</sup></i> | 3.20 | 3.10 - 3.30 | 0.049 | 40    | 20   |
|               |           | <i>let-60(n1046); hif-1(zh111)<sup>3</sup></i> | 4.32 | 4.08 - 4.55 | 0.184 | 95    | 20   |
| C04F2.1       | srh-79    | <i>let-60(n1046); egl-9(sa307)<sup>2</sup></i> | 3.50 | 3.28 - 3.77 | 0.756 | 47    | 32   |
|               |           | <i>let-60(n1046); hif-1(zh111)<sup>2</sup></i> | 4.61 | 4.31 - 4.90 | 0.412 | 92    | 26   |
| C13D9.4       | srsx-11   | <i>let-60(n1046); egl-9(sa307)<sup>2</sup></i> | 3.45 | 3.27 - 3.64 | 0.683 | 50    | 28   |
|               |           | <i>let-60(n1046); hif-1(zh111)<sup>2</sup></i> | 4.51 | 4.09 - 4.89 | 0.286 | 86    | 22   |
| C14E2.5       | -         | <i>let-60(n1046); egl-9(sa307)<sup>2</sup></i> | 3.47 | 3.18 - 3.80 | 0.676 | 36    | 25   |
|               |           | <i>let-60(n1046); hif-1(zh111)</i>             | n.a. | n.a.        | n.a.  | n.a.  | n.a. |
| C28H8.8       | -         | <i>let-60(n1046); egl-9(sa307)<sup>3</sup></i> | 3.16 | 3.00 - 3.36 | 0.784 | 14    | 22   |
|               |           | <i>let-60(n1046); hif-1(zh111)<sup>3</sup></i> | 4.35 | 4.12 - 4.62 | 0.244 | 96    | 26   |
| C50E3.9       | -         | <i>let-60(n1046); egl-9(sa307)<sup>2</sup></i> | 3.48 | 3.33 - 3.65 | 0.822 | 61    | 33   |
|               |           | <i>let-60(n1046); hif-1(zh111)<sup>2</sup></i> | 4.65 | 4.31 - 4.98 | 0.480 | 90    | 29   |
| F13B9.6       | cutl-29   | <i>let-60(n1046); egl-9(sa307)<sup>2</sup></i> | 3.55 | 3.33 - 3.79 | 0.882 | 57    | 21   |
|               |           | <i>let-60(n1046); hif-1(zh111)</i>             | n.a. | n.a.        | n.a.  | n.a.  | n.a. |
| F56C3.3       | -         | <i>let-60(n1046); egl-9(sa307)<sup>2</sup></i> | 3.31 | 3.15 - 3.52 | 0.262 | 35    | 31   |
|               |           | <i>let-60(n1046); hif-1(zh111)<sup>2</sup></i> | 4.35 | 3.98 - 4.72 | 0.084 | 83    | 23   |
| K02F6.1       | -         | <i>let-60(n1046); egl-9(sa307)<sup>4</sup></i> | 3.03 | 3.00 - 3.08 | 0.000 | 5     | 20   |
|               |           | <i>let-60(n1046); hif-1(zh111)<sup>4</sup></i> | 4.14 | 3.91 - 4.34 | 0.005 | 86    | 29   |
| R04D3.1       | cyp-14A4  | <i>let-60(n1046); egl-9(sa307)<sup>2</sup></i> | 3.49 | 3.33 - 3.66 | 0.794 | 61    | 38   |
|               |           | <i>let-60(n1046); hif-1(zh111)<sup>2</sup></i> | 4.98 | 4.72 - 5.25 | 0.027 | 97    | 30   |
| R52.2         | -         | <i>let-60(n1046); egl-9(sa307)<sup>4</sup></i> | 3.58 | 3.38 - 3.83 | 0.050 | 58    | 26   |
|               |           | <i>let-60(n1046); hif-1(zh111)<sup>4</sup></i> | 4.93 | 4.64 - 5.24 | 0.902 | 97    | 29   |
| T05B9.2       | -         | <i>let-60(n1046); egl-9(sa307)<sup>2</sup></i> | 3.07 | 3.00 - 3.17 | 0.000 | 11    | 27   |
|               |           | <i>let-60(n1046); hif-1(zh111)<sup>2</sup></i> | 4.71 | 4.40 - 4.98 | 0.627 | 97    | 30   |
| T06G6.2       | sra-24    | <i>let-60(n1046); egl-9(sa307)<sup>4</sup></i> | 3.52 | 3.30 - 3.80 | 0.870 | 41    | 27   |
|               |           | <i>let-60(n1046); hif-1(zh111)<sup>4</sup></i> | 5.15 | 4.89 - 5.39 | 0.005 | 100   | 23   |
| T07H3.4       | clec-21   | <i>let-60(n1046); egl-9(sa307)<sup>2</sup></i> | 3.29 | 3.11 - 3.52 | 0.241 | 28    | 32   |
|               |           | <i>let-60(n1046); hif-1(zh111)<sup>2</sup></i> | 4.23 | 3.95 - 4.55 | 0.008 | 83    | 29   |
| Y38C1BA.3     | col-109   | <i>let-60(n1046); egl-9(sa307)<sup>2</sup></i> | 3.51 | 3.31 - 3.73 | 0.806 | 46    | 39   |
|               |           | <i>let-60(n1046); hif-1(zh111)<sup>2</sup></i> | 4.80 | 4.43 - 5.15 | 0.757 | 90    | 20   |
| Y38H6C.2      | srw-65    | <i>let-60(n1046); egl-9(sa307)<sup>2</sup></i> | 3.38 | 3.22 - 3.58 | 0.475 | 44    | 25   |
|               |           | <i>let-60(n1046); hif-1(zh111)<sup>2</sup></i> | 4.69 | 4.42 - 4.95 | 0.576 | 97    | 31   |
| CC8.2         | -         | <i>let-60(n1046); egl-9(sa307)</i>             | n.a. | n.a.        | n.a.  | n.a.  | n.a. |
|               |           | <i>let-60(n1046); hif-1(zh111)</i>             | n.a. | n.a.        | n.a.  | n.a.  | n.a. |
| eV            | -         | <i>let-60(n1046); egl-9(sa307)<sup>1</sup></i> | 3.40 | 3.14 - 3.67 | -     | 38    | 21   |
|               |           | <i>let-60(n1046); hif-1(zh111)<sup>1</sup></i> | 4.17 | 3.71 - 4.66 | -     | 68    | 19   |
| eV            | -         | <i>let-60(n1046); egl-9(sa307)<sup>2</sup></i> | 3.39 | 3.24 - 3.53 | -     | 41    | 59   |
|               |           | <i>let-60(n1046); hif-1(zh111)<sup>2</sup></i> | 4.65 | 4.44 - 4.85 | -     | 98    | 56   |
| eV            | -         | <i>let-60(n1046); egl-9(sa307)<sup>3</sup></i> | 3.08 | 3.00 - 3.15 | -     | 15    | 20   |
|               |           | <i>let-60(n1046); hif-1(zh111)<sup>3</sup></i> | 4.48 | 4.23 - 4.73 | -     | 95    | 22   |
| eV            | -         | <i>let-60(n1046); egl-9(sa307)<sup>4</sup></i> | 3.34 | 3.18 - 3.52 | -     | 43    | 28   |
|               |           | <i>let-60(n1046); hif-1(zh111)<sup>4</sup></i> | 4.64 | 4.29 - 4.94 | -     | 100   | 24   |
