# Supplementary material for: The hypoxia-response pathway modulates RAS/MAPK–mediated cell fate decisions in Caenorhabditis elegans
Source: PubMed Central journal article supplement (PMC6536719; doi:10.26508/lsa.201800255), 2019-05-24
Supplement: LSA-2018-00255_TableS2.pdf [file LSA-2018-00255_TableS2.pdf]

| Sequence Name | Gene Name          |
|---------------|--------------------|
| K08C7.5       | <i>fmo-2</i>       |
| F22B5.4       | -                  |
| F42A10.4a     | <i>efk-1</i>       |
| F59B10.4      | -                  |
| C24B9.9       | <i>dod-3</i>       |
| F44B9.1a      | <i>dpf-6</i>       |
| C31G12.2      | <i>cllec-245</i>   |
| Y38E10A.23    | -                  |
| R10D12.1      | -                  |
| F56A3.3a      | <i>npp-6</i>       |
| C34D4.14      | <i>hecd-1</i>      |
| K04H4.2       | -                  |
| C04A2.1       | <i>tbc-6</i>       |
| F02E8.6       | <i>npc-1/ncr-1</i> |
| F45D11.1      | -                  |
| K02E7.6       | -                  |
| F16G10.10     | -                  |
| Y48G8AL.6     | <i>smg-2</i>       |
| C01G6.8a      | <i>cam-1</i>       |
| F57B9.1       | -                  |
| F21D12.3      | -                  |
| T08G3.6       | -                  |
| Y46G5A.6      | -                  |
| M05D6.5       | -                  |
| C34B7.3       | <i>cyp-36A1</i>    |
| M03A1.1a      | <i>vab-1</i>       |
| Y55F3BR.4     | <i>lgc-33</i>      |
| C32D5.12      | -                  |
| Y19D10A.5     | -                  |
| C05D12.1      | -                  |
| C05E4.2       | <i>str-20</i>      |
| C10G11.3      | <i>srh-51</i>      |
| C42D4.13      | -                  |
| C42D4.2       | -                  |
| C50E10.6      | <i>sre-54</i>      |
| F20D6.1       | -                  |
| F25G6.5       | <i>stdh-4</i>      |
| F57G8.1       | <i>srh-180</i>     |
| H27D07.6      | <i>srh-87</i>      |
| R09B5.3       | <i>cnc-2</i>       |
| R09E10.2      | -                  |
| R186.6        | <i>mpst-7</i>      |
| T04A11.10     | <i>sru-17</i>      |
| T06E4.8       | -                  |
| T07C5.5       | <i>nhr-26</i>      |
| T17H7.1       | -                  |
| W02A2.3       | <i>pqn-74</i>      |
| ZK938.6       | <i>chil-9</i>      |
