# Supplementary material for: The hypoxia-response pathway modulates RAS/MAPK–mediated cell fate decisions in Caenorhabditis elegans
Source: PubMed Central journal article supplement (PMC6536719; doi:10.26508/lsa.201800255), 2019-05-24
Supplement: LSA-2018-00255_TableS3.pdf [file LSA-2018-00255_TableS3.pdf]

| strain number(s)       | genotype                                                                                                        | reference                 | remarks                               |
|------------------------|-----------------------------------------------------------------------------------------------------------------|---------------------------|---------------------------------------|
| AH13                   | <i>let-23(sy1)</i>                                                                                              | Aroian and Sternberg 1991 | outcrossed original strain            |
| AH2927                 | <i>rrf-3(pk1426); rde-1(ne219); let-60(n1046); zhEx418[lin-31p::rde-1; myo-2::mCherry]</i>                      | Haag et al. 2014          |                                       |
| AH3195, AH3196, AH3198 | <i>let-60(n1046); vhl-1(ok161)</i>                                                                              | this study                |                                       |
| AH3201, AH3253, AH3254 | <i>let-60(n1046)</i>                                                                                            | this study                | from cross with <i>vhl-1(ok161)</i>   |
| AH3264, AH3265, AH3292 | <i>let-60(n1046); hif-1(ia04)</i>                                                                               | this study                |                                       |
| AH3266, AH3267, AH3268 | <i>let-60(n1046)</i>                                                                                            | this study                | from cross with <i>hif-1(ia04)</i>    |
| AH3270, AH3271         | <i>let-60(n1046)</i>                                                                                            | this study                | from cross with <i>egl-9(sa307lf)</i> |
| AH3340                 | <i>let-60(zh122) (CB4856 background)</i>                                                                        | this study                |                                       |
| AH3345                 | <i>let-60(zh121) (N2 background)</i>                                                                            | this study                |                                       |
| AH4425                 | <i>rrf-3(pk1426); rde-1(ne219); let-60(n1046); duls?[elt-2p::rde-1(+); pRF4]</i>                                | Schmid et al. 2015        |                                       |
| AH4533                 | <i>hif-1(zh111)</i>                                                                                             | this study                |                                       |
| AH4553, AH4554, AH4565 | <i>let-60(n1046); hif-1(zh111)</i>                                                                              | this study                |                                       |
| AH4571-AH4573          | <i>let-60(n1046); egl-9(sa307) hif-1(ia04)</i>                                                                  | this study                |                                       |
| AH4576                 | <i>unc-119(ed3); let-60(n1046); ials38[egl-9p::egl-9::tag, unc-119(+)]</i>                                      | this study                |                                       |
| AH4577                 | <i>let-60(n1046); egl-9(sa307); ials38[egl-9p::egl-9::tag, unc-119(+)]</i>                                      | this study                |                                       |
| AH4588                 | <i>lin-45(sy96)</i>                                                                                             | this study                | from cross with <i>egl-9(sa307lf)</i> |
| AH4594                 | <i>ials38[egl-9p::egl-9::tag, unc-119(+)]</i>                                                                   | this study                | outcrossed original strain            |
| AH4596                 | <i>let-60(n1046); ials38[egl-9p::egl-9::tag + unc-119(+)]</i>                                                   | this study                |                                       |
| AH4596                 | <i>let-60(n2021); egl-9(sa307); ials38[egl-9p::egl-9::tag, unc-119(+)]</i>                                      | this study                |                                       |
| AH4636                 | <i>let-60(n1046); iaEx101[egl-9p::egl-9(H487A)::tag, unc-119(+)]</i>                                            | this study                |                                       |
| AH4638                 | <i>lin-12(n137n720)/hT2[bli-4(e937) let-?(q782) qls48]</i>                                                      | this study                | from cross with <i>egl-9(sa307lf)</i> |
| AH4641                 | <i>lin-12(n137)/hT2[bli-4(e937) let-?(q782) qls48]</i>                                                          | this study                | from cross with <i>egl-9(sa307lf)</i> |
| AH4661-AH4663          | <i>let-60(n1046); egl-9(sa307)</i>                                                                              | this study                |                                       |
| AH4664-AH4666          | <i>let-60(n1046); sos-1(s1031)</i>                                                                              | this study                | from cross with <i>egl-9(sa307lf)</i> |
| AH4667-AH4669          | <i>let-60(n1046); egl-9(sa307) sos-1(s1031)</i>                                                                 | this study                |                                       |
| AH4671                 | <i>lin-45(sy96); egl-9(sa307)</i>                                                                               | this study                |                                       |
| AH4698-AH4700          | <i>let-60(n1046); egl-9(sa307); iaEx101[egl-9p::egl-9(H487A)::tag, unc-119(+)]</i>                              | this study                |                                       |
| AH4703                 | <i>let-60(n2021); egl-9(sa307); ials38[egl-9p::egl-9::tag, unc-119(+)]</i>                                      | this study                |                                       |
| AH4722                 | <i>unc-32(e189) lin-12(n137n720)/hT2[bli-4(e937) let-?(q782) qls48]; egl-9(sa037)</i>                           | this study                |                                       |
| AH4728-AH4730          | <i>dpy-19(e1259) lin-12(n137)/hT2[bli-4(e937) let-?(q782) qls48]; egl-9(sa307)</i>                              | this study                |                                       |
| AH4763                 | <i>dpy-19(e1259) lin-12(n137)/hT2[bli-4(e937) let-?(q782) qls48]; ials38[egl-9p::egl-9::tag, unc-119(+)]</i>    | this study                |                                       |
| AH4826                 | <i>egl-9(sa307); opIs206[hif-1p::hif-1::gfp::hif-1 3'UTR, unc-119(+)]</i>                                       | this study                |                                       |
| AH4833                 | <i>unc-32(e189) lin-12(n137n720)/hT2[bli-4(e937) let-?(q782) qls48]; ials38[egl-9p::egl-9::tag, unc-119(+)]</i> | this study                |                                       |
| AH4833-AH4835          | <i>hT2[bli-4(e937) let-?(q782) qls48] / lin-12(n137n720); ials38[egl-9p::egl-9::tag, unc-119(+)]</i>            | this study                |                                       |
| AH4886, AH4891         | <i>let-60(n1046)</i>                                                                                            | this study                | from cross with <i>nhr-57(tm4533)</i> |
| AH4890, AH4893, AH4894 | <i>let-60(n1046); nhr-57(tm4533)</i>                                                                            | this study                |                                       |
| AH4896-AH4898          | <i>let-60(n1046); egl-9(sa307)</i>                                                                              | this study                | from cross with <i>nhr-57(tm4533)</i> |
| AH4930-AH4932          | <i>let-60(n1046); nhr-57(tm4533) egl-9(sa307)</i>                                                               | this study                |                                       |
| AH4936-AH4938          | <i>let-60(n1046); hif-1(zh111)</i>                                                                              | this study                | from cross with <i>nhr-57(tm4533)</i> |
| AH4939-AH4941          | <i>let-60(n1046); nhr-57(tm4533) hif-1(zh111)</i>                                                               | this study                |                                       |
| AH5039                 | <i>zhEx605[nhr-57p::nhr-57::nhr-57 3' UTR, unc-119(+)]</i>                                                      | this study                |                                       |
| AH5051, AH5052, AH5053 | <i>egl-9(sa307); zhEx605[nhr-57p::nhr-57::nhr-57 3' UTR, unc-119(+)]</i>                                        | this study                |                                       |
| AH5200                 | <i>arT185[lin-31p::ERK-KTR-mClover-T2A-mCherry-H2B::unc-54 3'UTR]; nhr-57(tm4533)</i>                           | this study                |                                       |
| AH5210                 | <i>arT185[lin-31p::ERK-KTR-mClover-T2A-mCherry-H2B::unc-54 3'UTR]; egl-9(sa307)</i>                             | this study                |                                       |
| AH552                  | <i>let-60(n1046); sals14[lin-48p::gfp]</i>                                                                      | Berset et al. 2005        |                                       |
| AH5531                 | <i>arT185[lin-31p::ERK-KTR-mClover-T2A-mCherry-H2B::unc-54 3'UTR]; egl-9(sa307) hif-1(ia04)</i>                 | this study                |                                       |
| AH5535                 | <i>arT185[lin-31p::ERK-KTR-mClover-T2A-mCherry-H2B::unc-54 3'UTR]; hif-1(ia04)</i>                              | this study                |                                       |
| AH5536                 | <i>arT185[lin-31p::ERK-KTR-mClover-T2A-mCherry-H2B::unc-54 3'UTR]; hif-1(zh111)</i>                             | this study                |                                       |
| BC1925                 | <i>let-60(n1046); sos-1(s1031)</i>                                                                              | Chang et al. 2000         |                                       |
| CB1413                 | <i>lin-7(e1413)</i>                                                                                             | Simske et al. 1996        |                                       |
| CB1417                 | <i>lin-3(e1417)</i>                                                                                             | Hwang et al. 2004         |                                       |
| CB1439                 | <i>lin-10(e1439)</i>                                                                                            | Whitfield et al. 1999     |                                       |
| EW15                   | <i>bar-1(ga80)</i>                                                                                              | Eisenmann et al. 1998     |                                       |
| GS8190                 | <i>arT185[lin-31p::ERK-KTR-mClover-T2A-mCherry-H2B::unc-54 3'UTR]</i>                                           | de la Cova et al. 2017    |                                       |
| MT1216                 | <i>egl-9(n586)</i>                                                                                              | Darby et al. 1999         |                                       |
| MT2124                 | <i>let-60(n1046)</i>                                                                                            | Beitel et al. 1990        |                                       |
| MT397                  | <i>lin-2(n397)</i>                                                                                              | Horvitz and Ferguson 1985 |                                       |
| MT4755                 | <i>sem-5(n2019)</i>                                                                                             | Clark et al. 1992         |                                       |
| MT4866                 | <i>let-60(ga89)</i>                                                                                             | Eisenmann et al. 1997     |                                       |
| MT8022                 | <i>lin-1(n304)</i>                                                                                              | Beitel et al. 1995        |                                       |
| PS427                  | <i>lin-45(sy96)</i>                                                                                             | Han et al. 1993           |                                       |
| SD1059                 | <i>gals37[lin-31::mpk-1; lin-31::D-mek]</i>                                                                     | Lackner and Kim, 1998     |                                       |
| SD573                  | <i>gals47[lin-31::mpk-1(); lin-31::D-mek()]</i>                                                                 | Lackner et al. 1998       |                                       |
| WS4274                 | <i>opIs206[hif-1p::hif-1::gfp::hif-1 3'UTR, unc-119(+)]</i>                                                     | Sendoel et al. 2010       |                                       |
| WS4289                 | <i>unc-119(ed3); vhl-1(ok161); opIs206[hif-1p::hif-1::gfp::hif-1 3'UTR, unc-119(+)]</i>                         | Sendoel et al. 2010       |                                       |
| ZG31                   | <i>hif-1(ia04)</i>                                                                                              | Jiang et al. 2001         |                                       |
